# Supplementary material for: Long-term Effectiveness of Adjuvant Goserelin in Premenopausal Women With Early Breast Cancer
Source: PubMed Central journal article supplement — J Natl Cancer Inst. 2009 Mar 4;101(5):341–9. doi: 10.1093/jnci/djn498 (PMC2650713; doi:10.1093/jnci/djn498), 2009-03-04
Supplement: djn498_1.pdf [file djn498_1.pdf]

**Supplementary Table 1. Distribution of women according to primary therapy received**

|                | Number of subjects (%) |                        |
|----------------|------------------------|------------------------|
|                | Goserelin<br>N=1354    | No Goserelin<br>N=1356 |
| Surgery        |                        |                        |
| Local excision | 675 (50)               | 696 (51)               |
| Mastectomy     | 663 (49)               | 651 (48)               |
| Unknown        | 16 (1)                 | 9 (1)                  |
| Radiotherapy   |                        |                        |
| Yes            | 817 (60)               | 870 (64)               |
| No             | 507 (38)               | 462 (34)               |
| Unknown        | 30 (2)                 | 24 (2)                 |
| Chemotherapy   |                        |                        |
| Yes            | 583 (43)               | 590 (44)               |
| No             | 766 (56)               | 761 (56)               |
| Unknown        | 5 (<1)                 | 5 (<1)                 |

**Supplementary Table 2. Number of deaths and first events in women allocated to receive goserelin or not**

|                                                         | Number of subjects (%) |                        |
|---------------------------------------------------------|------------------------|------------------------|
|                                                         | Goserelin<br>N=1351    | No Goserelin<br>N=1355 |
| All deaths (reported cause)                             | 316 (23.4)             | 374 (27.6)             |
| Due to breast cancer                                    | 239 (17.7)             | 281 (20.7)             |
| Not due to breast cancer, but breast cancer was present | 4 (0.3)                | 9 (0.7)                |
| Not due to breast cancer, but breast cancer not present | 25 (1.8)               | 22 (1.6)               |
| Unknown*                                                | 48 (3.6)               | 62 (4.6)               |
| All first events                                        | 536 (39.7)             | 612 (45.2)             |
| Death†                                                  | 23 (1.7)               | 32 (2.4)               |
| Local recurrence                                        | 161 (11.9)             | 204 (15.0)             |
| Distant recurrence                                      | 247 (18.3)             | 273 (20.1)             |
| Recurrence (unknown site)                               | 0                      | 1 (<0.1)               |
| New tumour#                                             | 105 (7.8)              | 102 (7.5)              |

\* in the statistical analysis these deaths were assumed to be due to breast cancer † includes 5 women who died from breast cancer but with no previous recorded date of recurrence (in the statistical analysis they were assumed to have had a distant recurrence just before dying)

# there were 50 women who had a new tumour before a recurrence

**Supplementary Table 3. Hazard ratios (Goserelin vs ‘No Goserelin’) for event-free survival, overall survival, recurrence and breast cancer mortality according to trial group.**

|           | Number randomised | Event-free survival |                                              | Overall survival |                                | Breast cancer recurrence |                                | Breast cancer mortality |                                |
|-----------|-------------------|---------------------|----------------------------------------------|------------------|--------------------------------|--------------------------|--------------------------------|-------------------------|--------------------------------|
|           |                   | No. events          | Hazard ratio HR (95% confidence interval CI) | No. events       | HR (95% CI)                    | No. events               | HR (95% CI)                    | No. events              | HR (95% CI)                    |
| CRUK      | 1191              | 497                 | 0.78<br>(0.65-0.93)                          | 282              | 0.79<br>(0.62-1.00)            | 413                      | 0.79<br>(0.65-0.96)            | 261                     | 0.78<br>(0.61-1.00)            |
| GIVIO     | 382               | 133                 | 1.01<br>(0.72-1.43)                          | 94               | 1.10<br>(0.73-1.65)            | 103                      | 1.18<br>(0.80-1.74)            | 81                      | 1.09<br>(0.71-1.69)            |
| SE Sweden | 208               | 101                 | 0.78<br>(0.52-1.15)                          | 74               | 0.68<br>(0.43-1.09)            | 89                       | 0.83<br>(0.54-1.26)            | 68                      | 0.75<br>(0.46-1.21)            |
| Stockholm | 925               | 417                 | 0.83<br>(0.68-1.00)                          | 240              | 0.83<br>(0.64-1.06)            | 336                      | 0.74<br>(0.60-0.92)            | 220                     | 0.80<br>(0.61-1.04)            |
| All       | 2706              | 1148                | 0.82<br>(0.73-0.92)<br>P=0.001               | 690              | 0.83<br>(0.71-0.96)<br>P=0.013 | 941                      | 0.81<br>(0.71-0.92)<br>P=0.001 | 630                     | 0.82<br>(0.70-0.96)<br>P=0.003 |

N: number of events

There was no evidence of heterogeneity between the trial group estimates of hazard ratio: event-free survival (p=0.77), overall survival (p=0.61), breast cancer recurrence (p=0.36), breast cancer mortality (p=0.73).

**Supplementary Table 4. Hazard ratios for event free survival associated with Goserelin and four pre-specified factors, according to whether women took tamoxifen or not**

| Factor                                  | Women who did not take tamoxifen<br>N=945                                       |                                                                          | Women who took tamoxifen<br>N=1761                                              |                                                                             |
|-----------------------------------------|---------------------------------------------------------------------------------|--------------------------------------------------------------------------|---------------------------------------------------------------------------------|-----------------------------------------------------------------------------|
|                                         | Hazard ratio<br>(95%<br>confidence<br>interval)<br>Goserelin vs<br>No Goserelin | p-value for<br>the interaction<br>between the<br>factor and<br>Goserelin | Hazard ratio<br>(95%<br>confidence<br>interval)<br>Goserelin vs<br>No Goserelin | p-value for<br>the<br>interaction<br>between the<br>factor and<br>Goserelin |
| Age <sup>2</sup>                        |                                                                                 |                                                                          |                                                                                 |                                                                             |
| < 40 years                              | 0.89 (0.58-1.35)                                                                | 0.25                                                                     | 0.86 (0.66-1.13)                                                                | 0.54                                                                        |
| ≥ 40                                    | 0.65 (0.52-0.80)                                                                |                                                                          | 0.95 (0.80-1.14)                                                                |                                                                             |
| Nodal status*                           |                                                                                 |                                                                          |                                                                                 |                                                                             |
| Negative                                | 0.58 (0.44-0.78)                                                                | 0.08                                                                     | 0.82 (0.66-1.02)                                                                | 0.17                                                                        |
| Positive                                | 0.84 (0.64-1.10)                                                                |                                                                          | 1.01 (0.82-1.24)                                                                |                                                                             |
| ER status                               |                                                                                 |                                                                          |                                                                                 |                                                                             |
| Negative                                | 0.75 (0.51-1.10)                                                                | 0.95                                                                     | 1.05 (0.79-1.39)                                                                | 0.61                                                                        |
| Positive                                | 0.69 (0.53-0.91)                                                                |                                                                          | 0.85 (0.70-1.05)                                                                |                                                                             |
| Unknown                                 | 0.66 (0.44-0.98)                                                                |                                                                          | 0.92 (0.67-1.26)                                                                |                                                                             |
| Prior chemotherapy                      |                                                                                 |                                                                          |                                                                                 |                                                                             |
| No                                      | 0.55 (0.42-0.73)                                                                | 0.045                                                                    | 0.87 (0.71-1.06)                                                                | 0.36                                                                        |
| Yes                                     | 0.83 (0.64-1.09)                                                                |                                                                          | 1.00 (0.80-1.24)                                                                |                                                                             |
| ER positive women<br>Prior chemotherapy |                                                                                 |                                                                          |                                                                                 |                                                                             |

|     |                  |      |                  |      |
|-----|------------------|------|------------------|------|
| No  | 0.62 (0.43-0.90) | 0.41 | 0.79 (0.60-1.03) | 0.37 |
| Yes | 0.78 (0.53-1.15) |      | 0.94 (0.69-1.28) |      |

---

\* negative (no nodes affected); positive ( $\geq 1$  node affected)

**Supplementary Table 5. Hazard ratios for event free survival associated with Goserelin, according to nodal status, prior chemotherapy and whether women took tamoxifen or not**

| Nodal status | Prior chemotherapy | Women who did not take tamoxifen |                                        | Women who took tamoxifen |                                        |
|--------------|--------------------|----------------------------------|----------------------------------------|--------------------------|----------------------------------------|
|              |                    | No. of women                     | Hazard ratio (95% confidence interval) | No. of women             | Hazard ratio (95% confidence interval) |
| Negative     | No                 | 416                              | 0.60 (0.44-0.81)                       | 831                      | 0.86 (0.68-1.09)                       |
| Negative     | Yes                | 48                               | 0.55 (0.17-1.80)                       | 133                      | 0.69 (0.36-1.30)                       |
| Positive     | No                 | 36                               | 0.39 (0.14-1.09)                       | 155                      | 0.78 (0.51-1.20)                       |
| Positive     | Yes                | 403                              | 0.91 (0.69-1.21)                       | 531                      | 1.08 (0.85-1.37)                       |
